# 1 Scans of the *MYC* mRNA reveal multiple stable secondary 2 structures—including a 3' UTR motif, conserved across 3 vertebrates, that can affect gene expression.

4 Collin A. O'Leary<sup>1,†</sup>, Ryan J. Andrews<sup>1,†</sup>, Van S. Tompkins<sup>1</sup>, Jonathan L. Chen<sup>2</sup>, Jessica L.  
5 Childs-Disney<sup>2</sup>, Matthew D. Disney<sup>2</sup>, and Walter N. Moss<sup>1,\*</sup>

6 <sup>1</sup>Roy J. Carver Department of Biophysics, Biochemistry and Molecular Biology, Iowa State  
7 University, Ames, IA 50011, United States of America

8 <sup>2</sup>Department of Chemistry, The Scripps Research Institute, Jupiter, FL 33458, United States of  
9 America.

10 <sup>†</sup>These authors contributed equally to this work

11 \*Corresponding Author: [wmoss@iastate.edu](mailto:wmoss@iastate.edu)

12 Short Title: *MYC* structure scan

## 13 Keywords

14 *MYC*, UTR, post-transcriptional regulation, RNA, miRNA

## 15 Abstract

16 The *MYC* gene encodes a human transcription factor and proto-oncogene that is dysregulated  
17 in over half of all known cancers. To better understand potential post-transcriptional regulatory  
18 features affecting *MYC* expression, we analyzed secondary structure in the *MYC* mRNA using a  
19 program that is optimized for finding small locally-folded motifs with a high propensity for  
20 function. This was accomplished by calculating folding metrics across the *MYC* sequence using  
21 a sliding analysis window and generating unique consensus base pairing models weighted by  
22 their lower-than-random predicted folding energy. A series of 30 motifs were identified, primarily  
23 in the 5' and 3' untranslated regions, which show evidence of structural conservation and  
24 compensating mutations across vertebrate *MYC* homologs. This analysis was able to  
25 recapitulate known elements found within an internal ribosomal entry site, as well as discover a  
26 novel element in the 3' UTR that is unusually stable and conserved. This novel motif was shown

27 to affect *MYC* expression: likely via modulation of miRNA target accessibility. In addition to  
28 providing basic insights into mechanisms that regulate *MYC* expression, this study provides  
29 numerous, potentially druggable RNA targets for the *MYC* gene, which is considered  
30 “undruggable” at the protein level.

## 31 **Introduction**

32 The *MYC* proto-oncogene is an important transcription factor that is required for programmed  
33 cell death (apoptosis) and cell proliferation [1]. It is a key component of oncogenesis [2] and,  
34 indeed, *MYC* is dysregulated in >50% of all cancers [3]. Post-transcriptional control plays  
35 significant roles in the regulation of many genes including *MYC*. Within the 5' untranslated  
36 region (UTR) of the *MYC* mRNA is a structured internal ribosomal entry site (IRES) that  
37 stimulates cap-independent translation under conditions where cap-dependent translation is  
38 inhibited: e.g. during apoptosis [4]. Consistent with other IRESs [5] the *MYC* IRES secondary  
39 structure, deduced from *in vitro* chemical probing data [6], is complex and contains two  
40 pseudoknots—motifs comprised of “non-nested” base pairing between looped out regions of  
41 RNA [7]. In addition to the IRES, other post-transcriptional regulatory mechanisms affect *MYC*  
42 expression—e.g. microRNAs (miRs) [8]—that may be affected by RNA structure [9].

43 To determine if other structured RNA regulatory elements can be playing roles in *MYC*  
44 expression, we applied a methodological pipeline for RNA motif discovery that was optimized  
45 from studies of the *Xist* lncRNA [10], as well as the Human [11], Zika and HIV genomes [12].  
46 There are two major steps in this pipeline: (1) a scanning step, where the RNA is examined  
47 using a sliding analysis window to record predicted metrics important for analyzing RNA  
48 secondary structure (e.g. the thermodynamic stability); and, (2) an analysis step where unique  
49 local motifs are defined then evaluated vs. comparative sequence/structure and/or experimental  
50 probing data. Each step is achieved using the programs `ScanFold-Scan` and `ScanFold-`

51 Fold, respectively. Used together these programs define the potential RNA structural properties  
52 of long sequences and identify motifs likely to be ordered to form, presumably functional,  
53 defined structures. This is accomplished by generating consensus structure models across all  
54 scanning windows, where base pairs are weighted by their thermodynamic z-score: a measure  
55 of the unusual stability of a sequence that is calculated by comparison to the folding energy of  
56 matched randomized control sequences. Here, negative values indicate sequences that are  
57 ordered to fold and that may be functional [13]. While the primary goal is to deduce what  
58 nucleotides may be functionally significant, ScanFold-Fold models can also increase  
59 prediction accuracy [12]

60 In this report, ScanFold-Scan and ScanFold-Fold were applied to the longest MYC RefSeq  
61 mRNA isoform to generate a map of its folding landscape as well as deduce motifs important to  
62 the regulation of expression. Numerous motifs were deduced, including those that recapitulated  
63 known structures in the MYC IRES.

## 64 Results

### 65 ScanFold-Scan *mapping of secondary structure in the MYC mRNA*

66 To predict RNA secondary structural characteristics important to MYC function, the RefSeq  
67 mRNA (NM\_001354870) was analyzed using the program ScanFold-Scan [12]. This isoform  
68 was selected for analysis, as it would contain all potential structural elements found in other  
69 (shorter) MYC isoforms. The mRNA sequence was analyzed using a 1 nt step and 70 nt window  
70 size (Figure 1 and Document S1). Several folding metrics were calculated across analysis  
71 windows, which are described in detail in the Materials and Methods and in reference [12].  
72 Briefly, the  $\Delta G^\circ$  measures the minimum (lowest or most stable) predicted change in the Gibb's  
73 free energy upon RNA folding and indicates the thermodynamic stability of RNA structure. The  
74 ensemble diversity (ED) is a measure of the structural diversity predicted in the folding

75 ensemble: low numbers indicate one or few dominant structures, while higher numbers indicate  
76 multiple conformations or a lack of structure. The z-score measures the propensity of a  
77 sequence to be ordered to fold into stable structures. Negative z-scores give the number of  
78 standard deviations more thermodynamically stable a sequence is vs. random (see Eq. 1).

79 The global trends in each metric are shown at the top of Figure 1. The trend in the predicted  
80 thermodynamic stability approximately follows the GC% and decreases across *MYC*: going from  
81 the highly stable 5' UTR to the relatively unstable 3' UTR. This trend is also discernible in the  
82 distributions of predicted  $\Delta G$ s for windows spanning the 5' UTR, coding region and 3' UTR of  
83 the mRNA (Fig. S1). The windows spanning the 5' and 3' UTR junctions are less stable than  
84 flanking sequences. ED values are more evenly distributed across *MYC*, however, jumps in  
85 values for windows spanning the 5' and 3' UTR coding region junctions were observed (Figs. 1  
86 and S1). Thermodynamic z-scores ranged from highly negative (-5.0; or 5 standard deviations  
87 more stable than random) values to positive ones (+2.8). The average z-score across *MYC* was  
88 only slightly negative (-0.4) and there was no evidence of global bias in z-score toward negative  
89 values. Notably, windows spanning the 5' UTR junction were shifted toward *positive* z-scores  
90 (average of +1.4). These trends in RNA structural stability are more striking when considering  
91 “short” UTR isoforms for *MYC* (Fig. S2), which end just upstream of the *MYC* IRES and  
92 downstream of Motif 17 (Fig. 1).

### 93 *ScanFold-Fold prediction of functional RNA structural motifs*

94 To deduce local RNA folding that may be functionally significant, all *ScanFold-Scan* prediction  
95 windows were analyzed using *ScanFold-Fold*. The *ScanFold-Fold* program generates  
96 weighted consensus secondary structures, where minimum free energy (MFE) base pairs that  
97 contribute to low z-scores are deduced across the scans. Using a cutoff of -1 *ScanFold-Fold*  
98 identified 354 bp (Document S2) across the mRNA, while a cutoff of -2 yields 46 bp that are

99 localized to the 3' UTR. Refolding the mRNA with -1 `ScanFold-Fold` bp as constraints added  
100 153 bp to the discovered motifs: e.g. by extending helices or closing unpaired bases in the  
101 consensus prediction (Document S2). These 507 bp are divided into 30 motifs that span the  
102 *MYC* mRNA (Fig. 1). Motif locations, as expected, correspond to negative dips in z-score;  
103 however, dips in  $\Delta G^\circ$  and ED are also observed at motif sites. The most prominent regions with  
104 dips in metrics occur at Motifs 17 and 18 (Fig. 1), which contain very low z-score base pairs  
105 (cutoff < -2) deduced by `ScanFold-Fold`. These two motifs, particularly Motif 17, had the most  
106 favorable `ScanFold` metrics of any region/motif predicted for *MYC*.

107 All motif bp were analyzed versus an alignment of 15 vertebrate mRNA sequences (Document  
108 S3). Motif 17 had the highest conservation of structure and was supported by the greatest  
109 number of consistent and compensatory mutations (Fig. 1). In general, Motifs 7–19 showed  
110 evidence of conservation, however, little conservation data was found outside these regions:  
111 particularly downstream of Motif 19, where the long 3' UTR annotated for the human *MYC*  
112 RefSeq mRNA is not present in the RefSeq mRNA annotations of other species (Document S3).

### 113 *Analysis of the MYC 5' and 3' UTRs*

114 Motifs 8 and 9 overlap a previously-studied structural feature of the *MYC* mRNA: the IRES [4,  
115 6]. Motif 8 is recapitulated in the *MYC* IRES structure Domain 1; only the base pairs in the  
116 hairpin spanning nt 110 to 136 (Fig. S3) are shifted over to allow the formation of pseudoknot  
117 helix  $\alpha$ . Motif 9 partially overlaps Domain 2, where nt 284 to 299 of Domain 2 are refolded into  
118 two hairpins (Fig. S3). Structure models were compared vs. an alignment of 50 vertebrate *MYC*  
119 UTR sequences (Document S4). The alternative models for Domain 2/Motif 9 are roughly  
120 equally well supported by comparative data. Both are comprised of base pairs conserved across  
121 vertebrates and that show evidence of possible compensatory mutations: e.g. C279–G284 in  
122 Domain 2 vs. A307–U334 and G309–C332 in Motif 9 (Fig. S3). Neither model can be discarded  
123 based on these data. Nucleotides within Motif 9 were found to be highly reactive to chemicals in

124 the previous *in vitro* analysis of the *MYC* UTR [6], thus their modeling as single stranded RNA.  
125 When overlaid on Motif 9, however, only 4 out of 21 modification sites were inconsistent with the  
126 ScanFold-Fold generated model (Fig. S3); additionally, sites of AMV reverse transcriptase  
127 pausing suggest that this region is structured.

128 Across the *MYC* mRNA, predicted structural metrics are most favorable in the windows that  
129 overlap Motif 17 in the 3' UTR (Fig. 1). There are marked dips in the  $\Delta G^\circ$ , ED and z-score; all  
130 indicating importance of structure in this region. The ScanFold-Fold predicted base pairs in  
131 Motif 17 are also the best-conserved across the 15 vertebrate alignment. Previous work on  
132 post-transcriptional regulation of *MYC* found that inclusion of the short 3' UTR sequence led to  
133 repression of luciferase expression [14] due to the inclusion of a miR-34 binding site. To  
134 determine if RNA structural features in the short 3' UTR (beyond Motif 17) could be playing  
135 additional roles, the entire sequence was refolded while constraining Motif 17 base pairs. The  
136 resulting global short UTR model (Fig. 2) places the ScanFold-Fold predicted Motif 17 into a  
137 multibranch loop structure that includes a novel short hairpin. An additional hairpin is also  
138 predicted downstream of the multibranch loop. The short 3' UTR model was analyzed vs. an  
139 alignment of 59 vertebrate *MYC* 3' UTR sequences (Document S5). This found the highest  
140 levels of base pair conservation in the two long Motif 17 hairpins (92% conservation), while the  
141 remaining structures are not well-conserved (64% conservation of base pairing). When  
142 mutations occur in the highly-conserved Motif 17 they preserve base pairing: e.g. four  
143 compensatory (double point) mutations are found in each hairpin in addition to four and two  
144 consistent (single point) mutations, respectively (Fig. 2). To see if an orthogonal approach would  
145 confirm the 3' UTR model structure or, perhaps, yield a better-conserved alternative model, the  
146 program RNAalifold [15] was used to evaluate the short 3' UTR alignment without any base  
147 pairing constraints. The RNAalifold program considers both the folding energy and comparative  
148 sequence data (implicitly) in prediction; the resulting consensus model (Figure S5) predicts

149 conserved structures that correspond to the two highly-conserved Motif 17 hairpins predicted by  
150 ScanFold-Fold.

### 151 *Functional analyses of the MYC 3' UTR*

152 As the most significant motifs predicted in *MYC* occurred in the 3' UTR, a known site of miRNA  
153 targeting, the locations of *MYC*-targeting miRNA binding sites were queried vs. predictions of  
154 structure. Of nine miRNAs with known interaction sites [8, 14, 16-20], *seven* occurred within  
155 Motif 17 (Fig. 3A and B). miR-34a/b/c, miR-449c and let-7a have overlapping seed binding sites  
156 in the unstructured region between the two highly-conserved Motif 17 hairpins (Fig. 3A and B).  
157 miR-145 binds downstream and partially overlaps the second hairpin. miR-148 has a seed  
158 binding site on the terminal stem-loop of the second hairpin. Interestingly, the two miRNAs that  
159 bind outside Motif 17 also do so in other ScanFold-Fold predicted structural motifs: miR-24  
160 binds in the stem region of Motif 18 (Fig. 3C), while miR-185 binds toward the 5' end of Motif 15  
161 (Fig. 3D). In all cases, conserved RNA structures are predicted to partially occlude miRNA  
162 target binding, potentially modulating their effects.

163 Motif 17 was selected for additional experimental analysis due to it having the strongest  
164 ScanFold prediction metrics (Fig. 1), high level of structure conservation (Fig. 2), and the  
165 presence of multiple miRNA binding sites (Fig. 3A and B). To assess the potential gene  
166 regulatory roles of this motif, a luciferase reporter construct was generated incorporating Motif  
167 17, along with 27 nt upstream and 11 nt downstream (including a poly(U) tract; Fig. 2). This  
168 sequence was inserted into the 3' UTR of the *Renilla luciferase* (RL) expressing pIS2 vector  
169 (referred to as the pIS2-M17 [Motif 17] vector; detailed in the Experimental Procedures). When  
170 assayed, the pIS2-M17 vector showed a significant decrease in both relative response ratio  
171 (RRR; Fig. 4)—a measure of luciferase activity—and translational efficiency (TE) when  
172 compared to the unregulated pIS2 control: a ~24% and ~68% decrease in RRR and TE,  
173 respectively. This is consistent with previous analyses of the *MYC* 3' UTR, where the entire

174 short UTR isoform was incorporated into pLSV (an analogous Luciferase vector) and, using a  
175 similar analysis pipeline, was shown to lead to gene repression [14]. Similarly, ablation of the  
176 miR-34a-c seed (and also, seed regions for miRs 449c and let-7a) showed that miRNA targeting  
177 was responsible for the repressive effects of this region.

178 To determine if RNA structure present in Motif 17 influences miRNA binding/repression, two  
179 mutant constructs, pIS2-AS1 (ablate stem 1) and pIS2-LS1 (lock stem 1), were designed to  
180 increase or decrease miRNA site accessibility respectively (Fig. 4) according to the  $\Delta\Delta G$  metric  
181 of Kurtesz et. al [21]. This metric accounts for both the energy needed to break native mRNA  
182 secondary structure and the energy gained by miRNA binding, and it was used to predict  
183 miRNA site accessibility for the WT and mutant constructs. The WT sequence, pIS2-M17, has a  
184 predicted  $\Delta\Delta G$  of -4.67, whereas pIS2-AS1 and pIS2-LS1 have values of -13.56 (more  
185 accessible) and +2.55 (less accessible) respectively. When assayed, pIS2-AS1 shows (Fig. 4) a  
186 ~11% decrease in its RRR and an increase in TE of ~20% compared to pIS2-M17, however,  
187 these values are not significantly different from each other (Fig. 4). pIS2-LS1 showed a  
188 substantial increase in both RRR and TE (~68% and ~70% increase respectively) when  
189 compared to pIS2-M17.

## 190 Discussion

191 The analyses performed in this report provide insights into the functions of RNA secondary  
192 structure in expression of *MYC*. The ScanFold-Scan results map out global features of RNA  
193 structure across the *MYC* mRNA. Interesting trends are observed moving across the sequence,  
194 where RNA structure thermodynamic stability decreases going 5' to 3', with marked “jumps” in  
195 instability observed at the UTR/coding-region junctions (Figs. S1 and S2). Likewise shifts toward  
196 more positive ED and z-score values were observed in junction-spanning windows: most  
197 dramatically at the 5' junction, which includes both the CUG (non-canonical) and AUG



198 (canonical) translation initiation sites. These results indicate a lack of stable structure here,  
199 reiterating previous observations that indicate inhibitory roles for thermodynamically stable RNA  
200 secondary structure at initiation sites [22]. We additionally find evidence that evolution may be  
201 specifically selecting for *MYC* initiation site sequences that are ordered to be less-stable than  
202 that predicted for sequences of similar composition (thus the positive z-scores); as well, the  
203 junction sequence is expected to have a volatile conformational ensemble, where no particular  
204 structure dominates (high ED).

205 The high and low respective thermodynamic stabilities of the 5' and 3' UTRs (Figs. S1 and S2)  
206 indicate differing roles for RNA folding in these regions. The highly-stable 5' UTR would be  
207 expected to inhibit canonical translation by obstructing scanning ribosomes; thus, the presence  
208 of an IRES in the *MYC* mRNA. This can provide mechanisms for fine-tuning the post-  
209 transcriptional regulation of the *MYC* gene by allowing it to be translated in a cap-independent  
210 manner. The *MYC* IRES was shown to be active in some, but not all tissue types and the  
211 variability of activity is attributed to the presence, or lack of, trans-regulatory elements (e.g.  
212 RBPs; [4]). This demonstrates how cis-elements of the mRNA can interact with trans-regulatory  
213 elements to diversify (i.e. regulate) the cellular levels of a protein.

214 In contrast, the low stability of the 3' UTR suggests a need for increased accessibility of the  
215 mRNA sequence: e.g. for intermolecular interactions with post-transcriptional regulatory factors  
216 such as miRNAs and regulatory proteins. Counterintuitively, the sites with the greatest evidence  
217 of having been ordered to fold into a specific structure are in the 3' UTR (e.g. Motifs 17 and 18  
218 in Fig. 1). Motif 17, for example, is the most well-conserved structured region in *MYC*—even  
219 more so than the IRES domain (Figs. 2 and S3)—and is supported via multiple compensatory  
220 and consistent base mutations. The highly favorable metrics and deep conservation of this motif  
221 throughout vertebrates indicated its biological importance, which was borne out by the analysis  
222 of miRNA binding sites (Fig. 3A and B) and Motif 17 function (Fig. 4). This motif acts as a hub

223 for miRNA interactions and may organize the *MYC* miRNA target sites for interactions: e.g. the  
224 two highly-conserved hairpins may act as a “structure cassette” for maintaining the single-  
225 strandedness of the miR-34, -449c, and -let-7a seed binding regions, while modulating the  
226 accessibility of additional bases for miRNA pairing that can affect the outcome of miRNA  
227 targeting: e.g. translational repression.

228 The second most favorable motif (Motif 18; Fig. 1) contains a miR-24 interacting region (Fig.  
229 3C). Notably, this interaction is “seedless” [17]—only three of the miR-24 seed nt are base  
230 paired to *MYC* (Fig. 3C). Most of the miR-24-interacting nt on *MYC* are predicted to be bound  
231 up in structure. Here, as in other interaction sites, RNA folding may be modulating accessibility.  
232 We observed that reducing the accessibility of miRNA binding in Motif 17 via pIS2-LS1  
233 increased RRR and TE—potentially by reducing the amounts of miRNA-mediated gene  
234 repression. On the other hand, pIS2-M17 (the WT motif) and pIS2-AS1 (that ablates the first  
235 stem loop) had similar RRR and TE. Additional cellular factors may influence how these  
236 structures affect miRNA targeting: e.g. interactions with RNA binding proteins or post-  
237 transcriptional modifications can affect RNA folding. Thus, structural motifs and their additional  
238 interactions and alterations may be a way to fine tune the effects of miRNA regulation of *MYC*.

239 Conserved RNA structural motifs may also serve other functions in regulating *MYC* expression.  
240 Both Motif 17 and 18 occur in a particularly GC-poor and thermodynamically unstable region of  
241 the 3' UTR (Fig. 1). This is due to long stretches of highly-conserved poly(U) (uridine) tracts that  
242 occur between and around these structural motifs (Documents S3 and S5). Interestingly,  
243 poly(U) tracts have been found to stabilize mRNA sequences via structural interactions with the  
244 poly(A) (adenosine) tail [23]. Thus, an additional function of *MYC* 3' UTR structural motifs may  
245 be to organize poly(U) tracts to facilitate interactions with the poly(A) tail. For example, in Figure  
246 2 the poly(U) sequence is bulged out between the second Motif 17 hairpin and the basal stem of  
247 the predicted multibranch loop, which could allow the poly(A) tail to “wind” around this structure:

248 e.g. in an analogous way to poly(U)-poly(A) interactions in viral and ncRNA stabilizing elements  
249 [24, 25]. Notably, our qPCR data does not indicate degradation of miRNA targeted RL  
250 transcripts. Instead, slight transcript accumulation is observed in experimental samples (which  
251 contain the poly(U) tract) compared to unregulated pS2 samples (Table S1). Motif 17, in  
252 addition to regulating miRNA target accessibility, may be affecting transcript stability by  
253 modulating interactions of the poly(U) tract with the poly(A) tail of the mRNA. More investigation  
254 is needed to parse out these interactions.

255 Additional functional motifs are predicted beyond Motif 18 (Fig. 1), which may also be  
256 functionally significant. Interestingly, cancer-associated *MYC* translocations [26] can lead to  
257 UTR truncations that delete predicted motifs: potentially impacting function and contributing to  
258 *MYC* dysregulation. Likewise, seven predicted motifs fall within the *MYC* coding region, which  
259 may be functionally significant: e.g. by providing roadblocks for translation that can affect protein  
260 folding [27] or by affecting interactions with regulatory factors [28]. Notably, miR-185 targets a  
261 sequence that overlaps Motif 15 (Fig. 3D), which falls within the *MYC* coding region (Fig. 1).  
262 Awareness of the importance of miRNA targeting in coding regions is growing [29] and,  
263 presumably, additional *MYC* miRNA interactors remain to be discovered.

264 To conclude, this report provides valuable information on *MYC* mRNA secondary structure that  
265 has implications toward a better understanding of post-transcriptional gene regulation. In  
266 addition to providing global structural data, discreet local motifs with a high propensity for  
267 function are proposed, including a particularly interesting motif in the 3' UTR that has been  
268 functionally validated. We showed Motif 17 possesses post-transcriptional regulatory function  
269 and, at the very least, this function is a result of structure regulated miRNA targeting. Our  
270 findings illustrate the utility of *ScanFold-Scan* and *ScanFold-Fold* in finding structured,  
271 regulatory motifs and highlight the important role of RNA secondary structure in the post-  
272 transcriptional gene regulation of *MYC* expression. This study provides a roadmap for further

273 analyses of the structure/function relationships in the *MYC* mRNA and a framework for  
274 understanding other experimental results. For example, identified clinically significant sequence  
275 variants can be cross-referenced to these results to deduce their potential impact on RNA  
276 folding. Additionally, these results generate a large list of structural motifs that may be  
277 druggable targets [30, 31] for *MYC*, which is considered undruggable at the protein level [3].

## 278 **Materials and Methods**

### 279 *In silico analyses*

280 The *Homo sapiens MYC* RefSeq mRNA sequence was downloaded from the NCBI nt database  
281 (GenBank Accession: NM\_002467.5). ScanFold-Scan was run using a single nt step size and  
282 window sizes of 70 (Document S1) and 120 nt (results with the longer window size were  
283 unchanged [data not shown], this 70 nt window was used in subsequent analyses). RNA  
284 structural metrics were calculated for windows using the RNAfold algorithm [32] using the  
285 Turner energy model [33, 34] at 37 °C. Z-score calculations were performed using the following  
286 equation (adapted from the approach of [13]):

$$287 \quad z\text{-score} = (\Delta G^{\circ}_{\text{native}} - \overline{\Delta G^{\circ}_{\text{random}}}) / \sigma \quad (\text{Eq. 1})$$

288 Here,  $\Delta G^{\circ}_{\text{native}}$  is the native sequence minimum free energy (MFE) predicted by RNAfold.  
289  $\overline{\Delta G^{\circ}_{\text{random}}}$  is the average MFE predicted for 100X mononucleotide randomized sequences. The  
290 standard deviation,  $\sigma$ , is calculated across all sequences. The other calculated data are: the P-  
291 value, which measures the fraction of random sequences that are more stable than native in the  
292 z-score calculation (this acts as a quality control measure for the z-score); the MFE  $\Delta G^{\circ}$ , which  
293 measures the thermodynamic stability of RNA secondary structure formation; the MFE base  
294 pairs that generate the MFE  $\Delta G^{\circ}$ , which are output in "dot-bracket" notation; the ensemble  
295 diversity (ED), which provides an estimate of the structural diversity in the RNA conformational

296 ensemble (e.g. low ED indicates a single dominant conformation); the fraction of the (f)MFE in  
297 the ensemble, which estimates the contribution of the MFE conformation to the ensemble; the  
298 ensemble centroid structure, which is the conformation most similar to others in the ensemble;  
299 and the nt frequencies and GC percentages.

300 ScanFold-Scan prediction windows were next analyzed using the program ScanFold-Fold  
301 to deduce consensus motifs weighted by the z-score. The ScanFold-Fold method is detailed  
302 in [12]. Resulting output consisted of a list of all base pairing partners predicted for each  
303 nucleotide of the *MYC* mRNA (Document S6) and a list of the most favorable base pairing  
304 partners when weighting by z-score (Document S7). From the latter, base pairs which  
305 contributed to consistently negative z-scores (i.e. bps with average z-scores less -1 from  
306 Document S7) were used as constraints in an RNAfold prediction on the entire mRNA under the  
307 additional constraint of a maximum bp distance of 300 nt. Base pairs that extended ScanFold-  
308 Fold helixes were identified and used to generate the final motif models (Document S2). For  
309 visualizing the results of modeling, 2D rendering were generated using VARNA [35] and figures  
310 were produced with Adobe Illustrator.

311 For the analysis of conservation of ScanFold-Fold motifs across *MYC*, homologous mRNAs  
312 for 14 representative vertebrates were obtained from the NCBI RefSeq RNA database [36]. This  
313 database was also queried using BLAST [37] to deduce homologs for the “short” *MYC* 5' and 3'  
314 UTR sequences. Alignments for the mRNA (Document S3) and UTRs (Documents S4 and S5)  
315 were performed using MAFFT [38], implementing the MAFFT-E-INS-i and MAFFT-G-INS-i  
316 strategies, respectively [39].

317 A global model for the short 3' UTR (defined/used in a previous study of miRNA targeting [14])  
318 was generated by constraining base pairs from Motif 17 and refolding the remaining sequence

319 using RNAfold [32]. A consensus secondary structure for the short *MYC* 3' UTR was predicted  
320 (Fig. S3) using RNAalifold [15] with the 3' UTR alignment (Document S5) as input.

### 321 *Experimental analyses*

322 **Cell Culture.** HeLa cells were incubated at 37°C and 5% CO<sub>2</sub> and maintained in DMEM  
323 supplemented with 10% FBS, penicillin and streptomycin, and L-glutamine. Cells were  
324 passaged at 60-80% confluence and used between 3-40 passages.

325 **Luciferase Vectors.** For our experiments, two luciferase plasmid vector backbones were used.  
326 Both the transfection control vector, pIS0, which encoded firefly (FF) luciferase, and the  
327 experimental vector, pIS2, which encoded renilla (RL) luciferase, were gifts from David Bartel  
328 (Addgene plasmid # 12178 ; <http://n2t.net/addgene:12178> ; RRID:Addgene\_12178) and  
329 (Addgene plasmid # 12177 ; <http://n2t.net/addgene:12177> ; RRID:Addgene\_12177). The  
330 pcDNA3.1-miR34a vector was a gift from Heidi Schwarzenbach (Addgene plasmid # 78125 ;  
331 <http://n2t.net/addgene:78125> ; RRID:Addgene\_78125).

332 To test the post-transcriptional regulation of ScanFold-Fold predicted motifs, the Motif 17  
333 sequence, along with 27 nt upstream and 11 nt downstream were incorporated into the 3'-UTR  
334 of pIS2 to generate pIS2-M17. Mutants that destabilize, pIS2-AS1, or stabilize, pIS2-LS1, the  
335 structure present in pIS2-M17 were generated. For pIS2-AS1, 6 mutations were incorporated  
336 that disrupt canonical base pairing in the first conserved hairpin. To generate pIS2-LS1, 3  
337 mutations and 1 base deletion were introduced in the bulge on the upstream side of the first  
338 conserved hairpin. Mutations that destabilize or stabilize Motif 17 were predicted using the  $\Delta\Delta G$   
339 metric as a measure of miRNA site accessibility (Kertesz et al., 2007). 70 nt upstream and 70 nt  
340 downstream of the miRNA target site were included in our  $\Delta\Delta G$  calculations.

341 The sequences for pIS2-M17, pIS2-AS1, and pIS2-LS1 were ordered as gBlocks from IDT and  
342 cloned using AgeI (5') and SpeI (3') restriction sites (sequences in Supplemental Table S2).

343 Insertion of experimental sequences into the 3'-UTR of pIS2 required double restriction enzyme  
344 digest (using AgeI and SpeI from NEB) of both the gBlock and pIS2, following digestion,  
345 fragment and vector DNA were purified (Zymo DNA Clean and Concentrator kit), ligated (T4  
346 Ligase from ThermoFischer), and transformed into DH5 $\alpha$ -T1 competent cells using standard  
347 procedures. Carbenicillin selected colonies were cultured and plasmids were extracted (Qiaprep  
348 kit) and sequenced using an Applied Biosystems 3730xl DNA Analyzer.

349 **Dual Luciferase Assay.** Dual luciferase assays followed recommendations of an established  
350 method (Etten et al., 2013). In brief, the pIS0 vector (FF) is transfected at constant levels across  
351 all samples to serve as an internal control to which RL luciferase expression is normalized. All  
352 samples were run as biological triplicates. HeLa cells were counted using a hemocytometer and  
353 plated in a 24-well dish at a density of 50,000 cells per well. After 48 hours, cells were  
354 transfected using Lipofectamine 3000 (ThermoFischer) with 500 nanograms total plasmid DNA  
355 at a 1:1:8 ratio (pIS0:pIS2-based:pcDNA3.1-miR34a). Twenty-four hours later, cells were  
356 trypsinized, resuspended, and split into each of a 24-well plate for RNA analysis (1 ml) and a  
357 96-well plate for the dual luciferase assay (0.2 ml). After another 24-hour incubation, cells in the  
358 96-well dish were lysed, and luciferase activity was measured using Promega's Dual Luciferase  
359 Reagent Assay kit on a Biotek Synergy 2 plate reader with a collection time of 10 seconds.  
360 Relative response ratios (RRR), the ratio of RL to FF relative light units (RLUs), were calculated  
361 for each sample and then normalized to the empty, unregulated pIS2 RRR. Cells from the 24-  
362 well plate were placed in TRIzol (ThermoFisher) and either stored at -80°C or immediately  
363 processed as below.

364 **RNA Processing and qPCR Analysis.** Cellular RNA was purified from samples in TRIzol using  
365 Zymo's Direct-Zol RNA Miniprep kit. Purified RNA was then Dnase I treated (NEB) for 2 hours at  
366 37°C and the resulting DNase-treated RNA was purified with Zymo's RNA Clean and

367 Concentrator kit. Reverse transcription was done using 1 microgram of purified RNA, random  
368 hexamers, and Superscript III (ThermoFisher).  
369 Relative abundance of RL transcripts across samples were measured by qPCR, performed  
370 using PowerUp SYBR Green Master Mix on 1% cDNA input on an Applied Biosystems  
371 QuantStudio 3 instrument (ThermoFisher). Data were analyzed using the  $\Delta\Delta C_t$  method, where  
372 the relative abundance of RL transcripts in the samples were determined using the FF transcript  
373 as the reference gene. Translational efficiencies (TE), a normalization metric ( $R_{RR}/2^{[-\Delta\Delta C_{t_{RL}}]}$ ),  
374 were calculated for each sample. Primers used in qPCR were: RL FWD 5'-  
375 ggaattataatgcttatctacgtgc-3'; RL REV 5'-cttgcgaaaaatgaagaccttttac-3'; FF FWD 5'-  
376 ctactgagactacatcagc-3'; and FF REV 5'-tccagatccacaaccttcgc-3'.

377 All data are available in the Supplemental Information. ScanFold-Scan and ScanFold-Fold  
378 are available for download from GitHub: <https://github.com/moss-lab/ScanFold>. RNAfold and  
379 RNAalifold are both bundled within the ViennaRNA package [32]: available at:  
380 <https://www.tbi.univie.ac.at/RNA/>.

## 381 **Acknowledgments**

382 This research was supported by NIH/NIGMS grant R00GM112877 (WNM) and startup funds  
383 from the Iowa State University College of Agriculture and Life Sciences and the Roy J. Carver  
384 Charitable Trust (WNM) as well as R01-GM097455 (MDD).

## 385 **Figure Legends**

386 **Figure 1.** Summary of ScanFold-Scan and ScanFold-Fold results for the short UTR *MYC*  
387 mRNA. At the top are charts indicating the predicted ScanFold-Scan metrics across the  
388 mRNA. The bars are set at the 1<sup>st</sup> nt of the 70 nt window, thus data corresponds to the 70 nt  
389 downstream of the bar. Below these is a cartoon of the *MYC* mRNA with UTRs and coding



390 region represented in thin and thick black lines, respectively. This cartoon is annotated with  
391 boxes which depict the location and extent of `ScanFold-Fold` predicted motifs shaded red  
392 based on the average z-score of windows in which motif base pairs occurred. Below these are  
393 RNA secondary structure arc diagrams which depict the most favorable base pairs predicted via  
394 `ScanFold-Fold`, colored according the average z-scores of windows in which they appear  
395 (with blue, green and yellow corresponding to less than -2, -1 and 0 z-scores averages  
396 respectively). Below these, are refolded models of the motifs built with -1 average z-score bps  
397 as constraints. Each is annotated with their bp conservation as determined from an alignment of  
398 15 representative mRNAs (Document S3) indicated by shading on the base pair (see key).  
399 Circled bases are sites of putative structure-preserving consistent and compensatory mutations.

400 **Figure 2.** Short MYC 3' UTR model. HP2–3 comprise Motif 17 of the `ScanFold-Fold` results,  
401 which were constrained in the calculation. Base pair conservation shading indicated in the key  
402 and data are taken from a comparison of 59 RefSeq mRNA vertebrate alignment (Document  
403 S5).

404 **Figure 3.** Annotations of miRNA binding sites on `ScanFold-Fold` predicted motifs. (A) Shows  
405 miRNA sequences above the “dot-bracket” structure of Motif 17 (matched brackets indicated  
406 base pairs). Seed sites and the complements on Motif 17 are colored. (B) Shows miRNA seed  
407 binding sites annotated on the 2D model of Motif 17. (C) Shows base-pairing between miR-24  
408 and the 2D model of Motif 18. (C) Shows base-pairing between miR-24 and the 2D model of  
409 Motif 15.

410 **Figure 4.** RRRs and TEs were calculated for each set of samples and normalized to the  
411 unregulated activity of pIS2. Error bars report the standard error. Experimental vectors pIS2-  
412 M17, pIS2-AS1, and pIS2-LS1 all display activity that differs from pIS2. pIS2-M17 and pIS2-AS1  
413 both show decreased RRRs while pIS2-LS1, which was designed to have a more stable and  
414 less accessible 3'-UTR, shows an increase in RRR compared to pIS2. pIS2-MSC displays a

415 large decrease in TE and pIS2-AS1, which is predicted to have a more accessible miRNA site,  
416 displays a TE which is slightly increased compared to pIS2-M17. The TE of pIS2-LS1 is  
417 markedly greater than pIS2-M17, possibly reflecting the decrease in miRNA target site  
418 accessibility. The  $\Delta\Delta G$  values for pIS2-M17, pIS2-AS1, and pIS2-LS1 are also shown along with  
419 destabilizing pIS2-AS1 mutations (displayed in red) and stabilizing pIS2-LS1 mutations  
420 (displayed in green).

## 421 Supplemental Material

422 Supplemental material is available for this report.

## 423 References

- 424 1. Dang CV. c-Myc target genes involved in cell growth, apoptosis, and metabolism. *Mol*  
425 *Cell Biol.* 1999;19(1):1-11. Epub 1998/12/22. PubMed PMID: 9858526; PubMed Central  
426 PMCID: PMCPMC83860.
- 427 2. Dang CV. MYC on the path to cancer. *Cell.* 2012;149(1):22-35. Epub 2012/04/03. doi:  
428 10.1016/j.cell.2012.03.003. PubMed PMID: 22464321; PubMed Central PMCID:  
429 PMCPMC3345192.
- 430 3. Dang CV, Reddy EP, Shokat KM, Soucek L. Drugging the 'undruggable' cancer targets.  
431 *Nat Rev Cancer.* 2017;17(8):502-8. Epub 2017/06/24. doi: 10.1038/nrc.2017.36. PubMed PMID:  
432 28643779; PubMed Central PMCID: PMCPMC5945194.
- 433 4. Stoneley M, Subkhankulova T, Le Quesne JP, Coldwell MJ, Jopling CL, Belsham GJ, et  
434 al. Analysis of the c-myc IRES; a potential role for cell-type specific trans-acting factors and the  
435 nuclear compartment. *Nucleic Acids Res.* 2000;28(3):687-94. Epub 2000/01/19. PubMed PMID:  
436 10637319; PubMed Central PMCID: PMCPMC102558.
- 437 5. Yamamoto H, Unbehaun A, Spahn CMT. Ribosomal Chamber Music: Toward an  
438 Understanding of IRES Mechanisms. *Trends Biochem Sci.* 2017;42(8):655-68. Epub  
439 2017/07/08. doi: 10.1016/j.tibs.2017.06.002. PubMed PMID: 28684008.
- 440 6. Le Quesne JP, Stoneley M, Fraser GA, Willis AE. Derivation of a structural model for the  
441 c-myc IRES. *J Mol Biol.* 2001;310(1):111-26. Epub 2001/06/23. doi: 10.1006/jmbi.2001.4745.  
442 PubMed PMID: 11419940.
- 443 7. Liu B, Mathews DH, Turner DH. RNA pseudoknots: folding and finding. *F1000 Biol Rep.*  
444 2010;2:8. doi: 10.3410/B2-8. PubMed PMID: 20495679; PubMed Central PMCID:  
445 PMCPMC2873773.
- 446 8. Jackstadt R, Hermeking H. MicroRNAs as regulators and mediators of c-MYC function.  
447 *Biochim Biophys Acta.* 2015;1849(5):544-53. Epub 2014/04/15. doi:  
448 10.1016/j.bbagr.2014.04.003. PubMed PMID: 24727092.
- 449 9. Wan Y, Kertesz M, Spitale RC, Segal E, Chang HY. Understanding the transcriptome  
450 through RNA structure. *Nat Rev Genet.* 2011;12(9):641-55. doi: 10.1038/nrg3049. PubMed  
451 PMID: 21850044; PubMed Central PMCID: PMCPMC3858389.
- 452 10. Fang R, Moss WN, Rutenberg-Schoenberg M, Simon MD. Probing Xist RNA Structure in  
453 Cells Using Targeted Structure-Seq. *PLoS Genet.* 2015;11(12):e1005668. doi:

- 454 10.1371/journal.pgen.1005668. PubMed PMID: 26646615; PubMed Central PMCID:  
455 PMCPMC4672913.
- 456 11. Andrews RJ, Baber L, Moss WN. RNAStructuromeDB: A genome-wide database for  
457 RNA structural inference. *Sci Rep.* 2017;7(1):17269. doi: 10.1038/s41598-017-17510-y.  
458 PubMed PMID: 29222504; PubMed Central PMCID: PMCPMC5722888.
- 459 12. Andrews R.J. RJ, Moss W.N. *ScanFold*: an approach for genome-wide discovery of  
460 local RNA structural elements—applications to Zika virus and HIV. *PeerJ Preprints.*  
461 2018;6:e6136. doi: <https://doi.org/10.7717/peerj.6136>
- 462 13. Clote P, Ferre F, Kranakis E, Krizanc D. Structural RNA has lower folding energy than  
463 random RNA of the same dinucleotide frequency. *RNA.* 2005;11(5):578-91. doi:  
464 10.1261/rna.7220505. PubMed PMID: 15840812; PubMed Central PMCID: PMCPMC1370746.
- 465 14. Kong YW, Cannell IG, de Moor CH, Hill K, Garside PG, Hamilton TL, et al. The  
466 mechanism of micro-RNA-mediated translation repression is determined by the promoter of the  
467 target gene. *Proc Natl Acad Sci U S A.* 2008;105(26):8866-71. Epub 2008/06/27. doi:  
468 10.1073/pnas.0800650105. PubMed PMID: 18579786; PubMed Central PMCID:  
469 PMCPMC2449332.
- 470 15. Bernhart SH, Hofacker IL, Will S, Gruber AR, Stadler PF. *RNAalifold*: improved  
471 consensus structure prediction for RNA alignments. *BMC Bioinformatics.* 2008;9:474. doi:  
472 10.1186/1471-2105-9-474. PubMed PMID: 19014431; PubMed Central PMCID:  
473 PMCPMC2621365.
- 474 16. Luan W, Wang Y, Chen X, Shi Y, Wang J, Zhang J, et al. PKM2 promotes glucose  
475 metabolism and cell growth in gliomas through a mechanism involving a let-7a/c-Myc/hnRNPA1  
476 feedback loop. *Oncotarget.* 2015;6(15):13006-18. Epub 2015/05/08. doi:  
477 10.18632/oncotarget.3514. PubMed PMID: 25948776; PubMed Central PMCID:  
478 PMCPMC4536995.
- 479 17. Lal A, Navarro F, Maher CA, Maliszewski LE, Yan N, O'Day E, et al. miR-24 Inhibits cell  
480 proliferation by targeting E2F2, MYC, and other cell-cycle genes via binding to "seedless" 3'UTR  
481 microRNA recognition elements. *Mol Cell.* 2009;35(5):610-25. Epub 2009/09/15. doi:  
482 10.1016/j.molcel.2009.08.020. PubMed PMID: 19748357; PubMed Central PMCID:  
483 PMCPMC2757794.
- 484 18. Sachdeva M, Zhu S, Wu F, Wu H, Walia V, Kumar S, et al. p53 represses c-Myc through  
485 induction of the tumor suppressor miR-145. *Proc Natl Acad Sci U S A.* 2009;106(9):3207-12.  
486 Epub 2009/02/10. doi: 10.1073/pnas.0808042106. PubMed PMID: 19202062; PubMed Central  
487 PMCID: PMCPMC2651330.
- 488 19. Liao JM, Lu H. Autoregulatory suppression of c-Myc by miR-185-3p. *J Biol Chem.*  
489 2011;286(39):33901-9. Epub 2011/08/13. doi: 10.1074/jbc.M111.262030. PubMed PMID:  
490 21832077; PubMed Central PMCID: PMCPMC3190790.
- 491 20. Miao LJ, Huang SF, Sun ZT, Gao ZY, Zhang RX, Liu Y, et al. MiR-449c targets c-Myc  
492 and inhibits NSCLC cell progression. *FEBS Lett.* 2013;587(9):1359-65. Epub 2013/03/20. doi:  
493 10.1016/j.febslet.2013.03.006. PubMed PMID: 23507140.
- 494 21. Kertesz M, Iovino N, Unnerstall U, Gaul U, Segal E. The role of site accessibility in  
495 microRNA target recognition. *Nat Genet.* 2007;39(10):1278-84. Epub 2007/09/26. doi:  
496 10.1038/ng2135. PubMed PMID: 17893677.
- 497 22. Gu W, Zhou T, Wilke CO. A universal trend of reduced mRNA stability near the  
498 translation-initiation site in prokaryotes and eukaryotes. *PLoS Comput Biol.*  
499 2010;6(2):e1000664. Epub 2010/02/09. doi: 10.1371/journal.pcbi.1000664. PubMed PMID:  
500 20140241; PubMed Central PMCID: PMCPMC2816680.
- 501 23. Geisberg JV, Moqtaderi Z, Fan X, Ozsolak F, Struhl K. Global analysis of mRNA isoform  
502 half-lives reveals stabilizing and destabilizing elements in yeast. *Cell.* 2014;156(4):812-24. Epub  
503 2014/02/18. doi: 10.1016/j.cell.2013.12.026. PubMed PMID: 24529382; PubMed Central  
504 PMCID: PMCPMC3939777.

- 505 24. Tycowski KT, Shu MD, Borah S, Shi M, Steitz JA. Conservation of a triple-helix-forming  
506 RNA stability element in noncoding and genomic RNAs of diverse viruses. *Cell Rep.*  
507 2012;2(1):26-32. Epub 2012/07/31. doi: 10.1016/j.celrep.2012.05.020. PubMed PMID:  
508 22840393; PubMed Central PMCID: PMC3430378.
- 509 25. Brown JA, Valenstein ML, Yario TA, Tycowski KT, Steitz JA. Formation of triple-helical  
510 structures by the 3'-end sequences of MALAT1 and MENbeta noncoding RNAs. *Proc Natl Acad*  
511 *Sci U S A.* 2012;109(47):19202-7. Epub 2012/11/07. doi: 10.1073/pnas.1217338109. PubMed  
512 PMID: 23129630; PubMed Central PMCID: PMC3511071.
- 513 26. Ott G, Rosenwald A, Campo E. Understanding MYC-driven aggressive B-cell  
514 lymphomas: pathogenesis and classification. *Blood.* 2013;122(24):3884-91. Epub 2013/09/07.  
515 doi: 10.1182/blood-2013-05-498329. PubMed PMID: 24009228.
- 516 27. Faure G, Ogurtsov AY, Shabalina SA, Koonin EV. Role of mRNA structure in the control  
517 of protein folding. *Nucleic Acids Res.* 2016;44(22):10898-911. doi: 10.1093/nar/gkw671.  
518 PubMed PMID: 27466388; PubMed Central PMCID: PMC5159526.
- 519 28. Glisovic T, Bachorik JL, Yong J, Dreyfuss G. RNA-binding proteins and post-  
520 transcriptional gene regulation. *FEBS Lett.* 2008;582(14):1977-86. Epub 2008/03/18. doi:  
521 10.1016/j.febslet.2008.03.004. PubMed PMID: 18342629; PubMed Central PMCID:  
522 PMC32858862.
- 523 29. Zhang K, Zhang X, Cai Z, Zhou J, Cao R, Zhao Y, et al. A novel class of microRNA-  
524 recognition elements that function only within open reading frames. *Nat Struct Mol Biol.*  
525 2018;25(11):1019-27. Epub 2018/10/10. doi: 10.1038/s41594-018-0136-3. PubMed PMID:  
526 30297778; PubMed Central PMCID: PMC6219929.
- 527 30. Tran T, Disney MD. Identifying the preferred RNA motifs and chemotypes that interact  
528 by probing millions of combinations. *Nat Commun.* 2012;3:1125. Epub 2012/10/11. doi:  
529 10.1038/ncomms2119. PubMed PMID: 23047683; PubMed Central PMCID: PMC3533436.
- 530 31. Angelbello AJ, Chen JL, Childs-Disney JL, Zhang P, Wang ZF, Disney MD. Using  
531 Genome Sequence to Enable the Design of Medicines and Chemical Probes. *Chem Rev.*  
532 2018;118(4):1599-663. Epub 2018/01/13. doi: 10.1021/acs.chemrev.7b00504. PubMed PMID:  
533 29322778; PubMed Central PMCID: PMC5989578.
- 534 32. Lorenz R, Bernhart SH, Honer Zu Siederdisen C, Tafer H, Flamm C, Stadler PF, et al.  
535 ViennaRNA Package 2.0. *Algorithms Mol Biol.* 2011;6:26. doi: 10.1186/1748-7188-6-26.  
536 PubMed PMID: 22115189; PubMed Central PMCID: PMC3319429.
- 537 33. Mathews DH, Disney MD, Childs JL, Schroeder SJ, Zuker M, Turner DH. Incorporating  
538 chemical modification constraints into a dynamic programming algorithm for prediction of RNA  
539 secondary structure. *Proc Natl Acad Sci U S A.* 2004;101(19):7287-92. doi:  
540 10.1073/pnas.0401799101. PubMed PMID: 15123812; PubMed Central PMCID:  
541 PMC409911.
- 542 34. Turner DH, Mathews DH. NNDB: the nearest neighbor parameter database for  
543 predicting stability of nucleic acid secondary structure. *Nucleic Acids Res.* 2010;38(Database  
544 issue):D280-2. Epub 2009/11/03. doi: 10.1093/nar/gkp892. PubMed PMID: 19880381; PubMed  
545 Central PMCID: PMC2808915.
- 546 35. Darty K, Denise A, Ponty Y. VARNA: Interactive drawing and editing of the RNA  
547 secondary structure. *Bioinformatics.* 2009;25(15):1974-5. doi: 10.1093/bioinformatics/btp250.  
548 PubMed PMID: 19398448; PubMed Central PMCID: PMC2712331.
- 549 36. O'Leary NA, Wright MW, Brister JR, Ciufo S, Haddad D, McVeigh R, et al. Reference  
550 sequence (RefSeq) database at NCBI: current status, taxonomic expansion, and functional  
551 annotation. *Nucleic Acids Res.* 2016;44(D1):D733-45. Epub 2015/11/11. doi:  
552 10.1093/nar/gkv1189. PubMed PMID: 26553804; PubMed Central PMCID: PMC4702849.
- 553 37. Altschul SF, Gish W, Miller W, Myers EW, Lipman DJ. Basic local alignment search tool.  
554 *J Mol Biol.* 1990;215(3):403-10. Epub 1990/10/05. doi: 10.1016/S0022-2836(05)80360-2.  
555 PubMed PMID: 2231712.

- 556 38. Katoh K, Misawa K, Kuma K, Miyata T. MAFFT: a novel method for rapid multiple  
557 sequence alignment based on fast Fourier transform. *Nucleic Acids Res.* 2002;30(14):3059-66.  
558 Epub 2002/07/24. PubMed PMID: 12136088; PubMed Central PMCID: PMC135756.  
559 39. Katoh K, Standley DM. MAFFT: iterative refinement and additional methods. *Methods*  
560 *Mol Biol.* 2014;1079:131-46. Epub 2013/10/31. doi: 10.1007/978-1-62703-646-7\_8. PubMed  
561 PMID: 24170399.

562

563



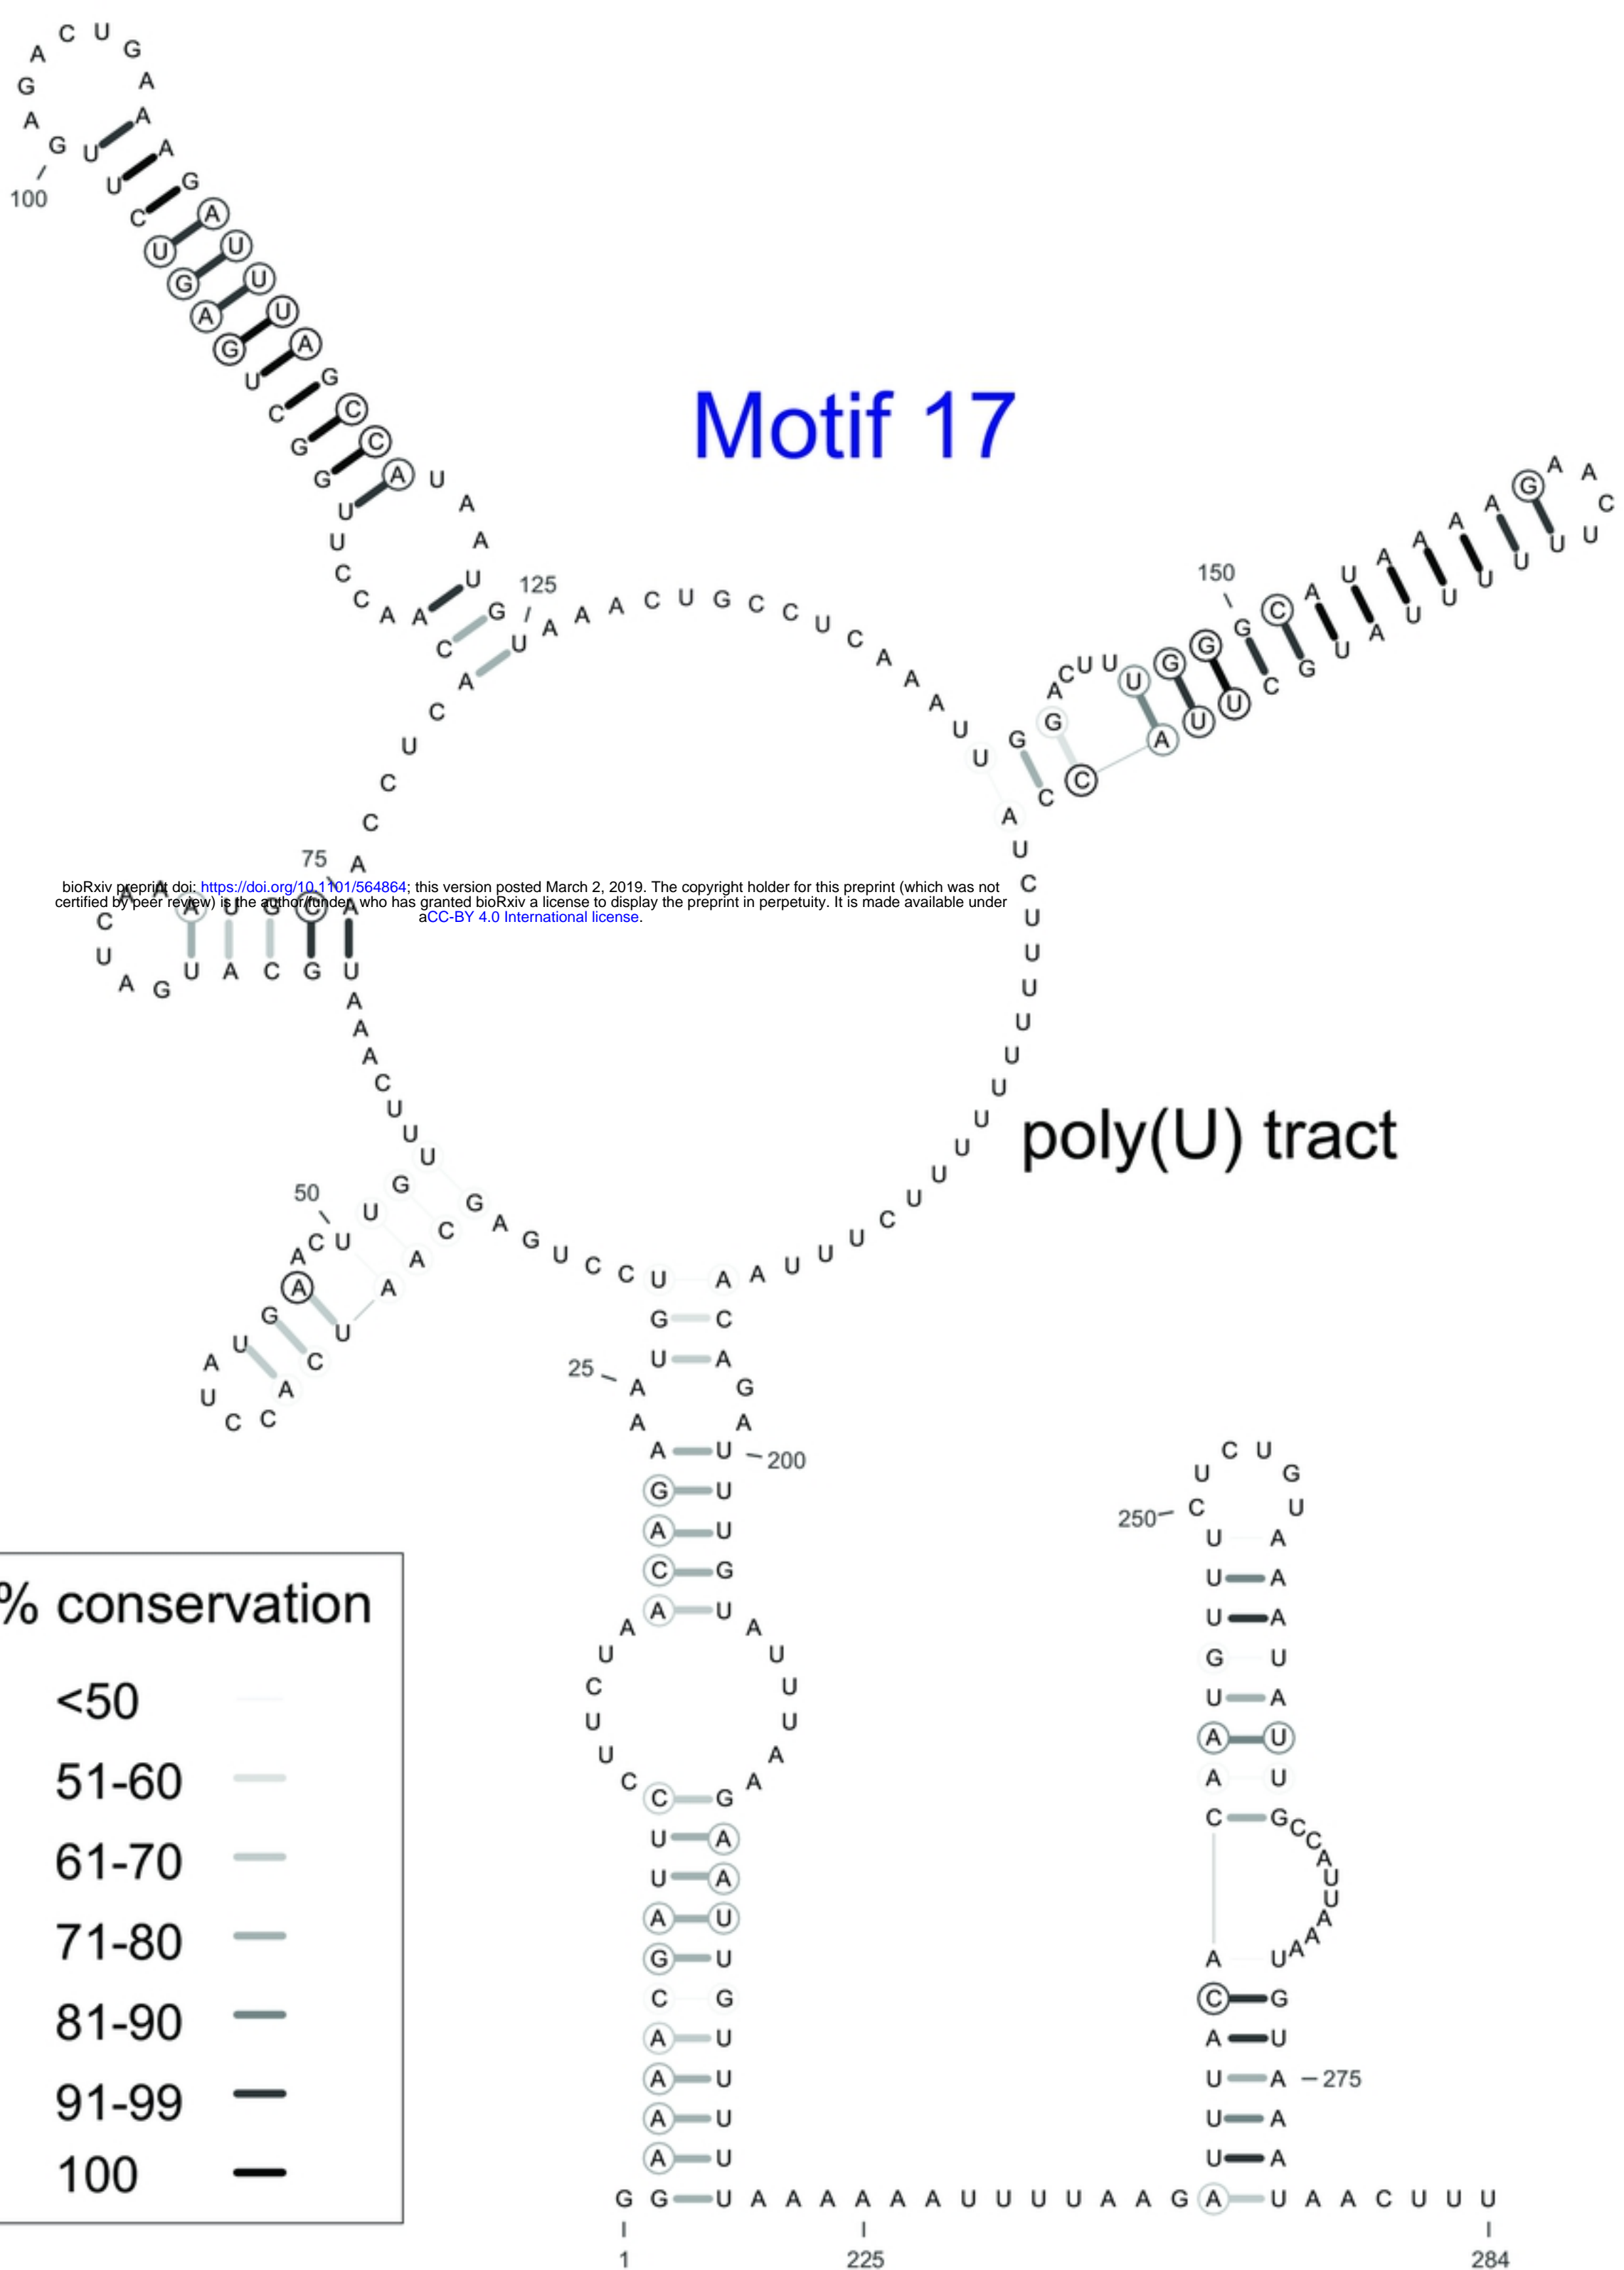

Figure 2

A

miR-145 3'-UUCCCUAAGGACCCU**UUUGACCU**G-5'  
 miR-let-7a 3'-UUGAUAUGUUGGAU**GAUGGAGU**-5'  
 miR-449c 3'-UGUCGGCGAUCGUUAUG**UGACGGAU**-5'  
 miR-34c 3'-CGUUAGUCGAUUGAUG**UGACGGA**-5'  
 miR-34b 3'-GUUAGUCGAUUACUG**UGACGGAU**-5'  
 miR-34a 3'-UUGUUGGUCGAUUCUG**UGACGGU**-5' 3'-UCAGCCUCACAGAG**UCUUGAAA**-5' miR-148a

5'-ACAACCUUGGCUGAGUCUUGAGACUGAAAGAUUUAGCCAUA AUGUAA**ACUGCCUC****AAAUUGGA**CUUUGGGCAUAAA**AGAACUU**UUUUUAUGCUUACCA-3'  
 (((.....((((((((((((((((.....)))))))))))))).....((((.....((((((((((((((((.....))))))))))))))))))

B

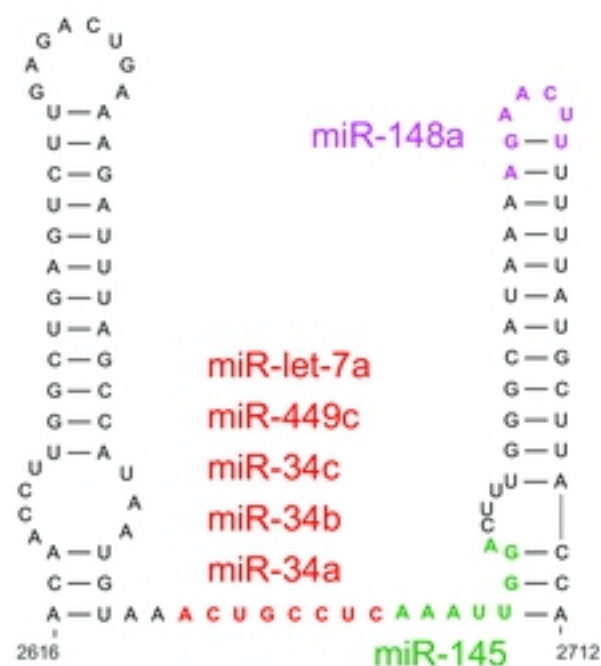

C

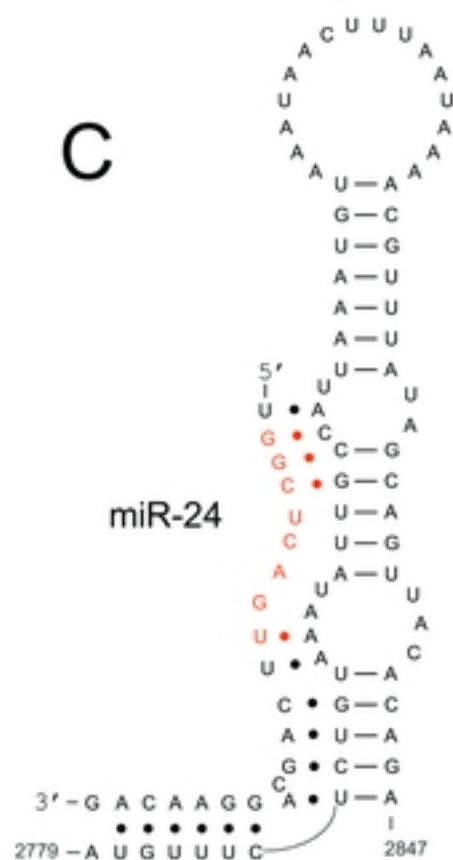

D

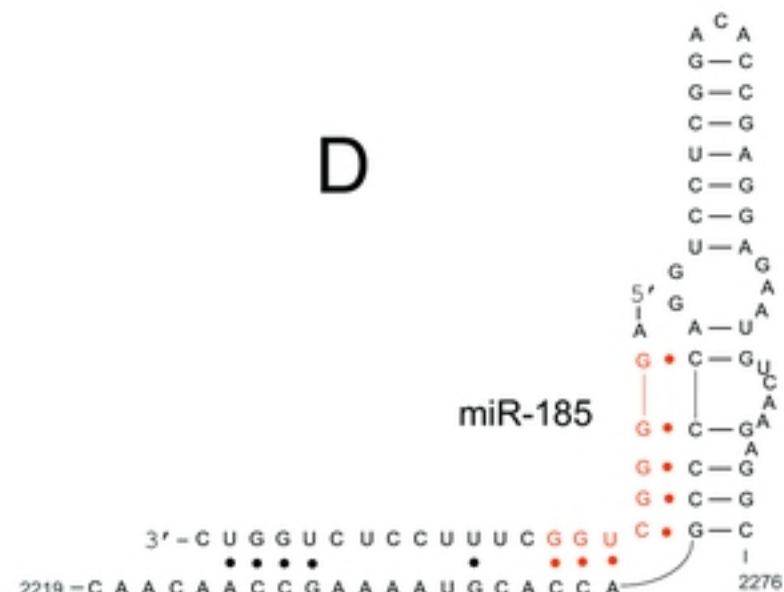

Figure 3

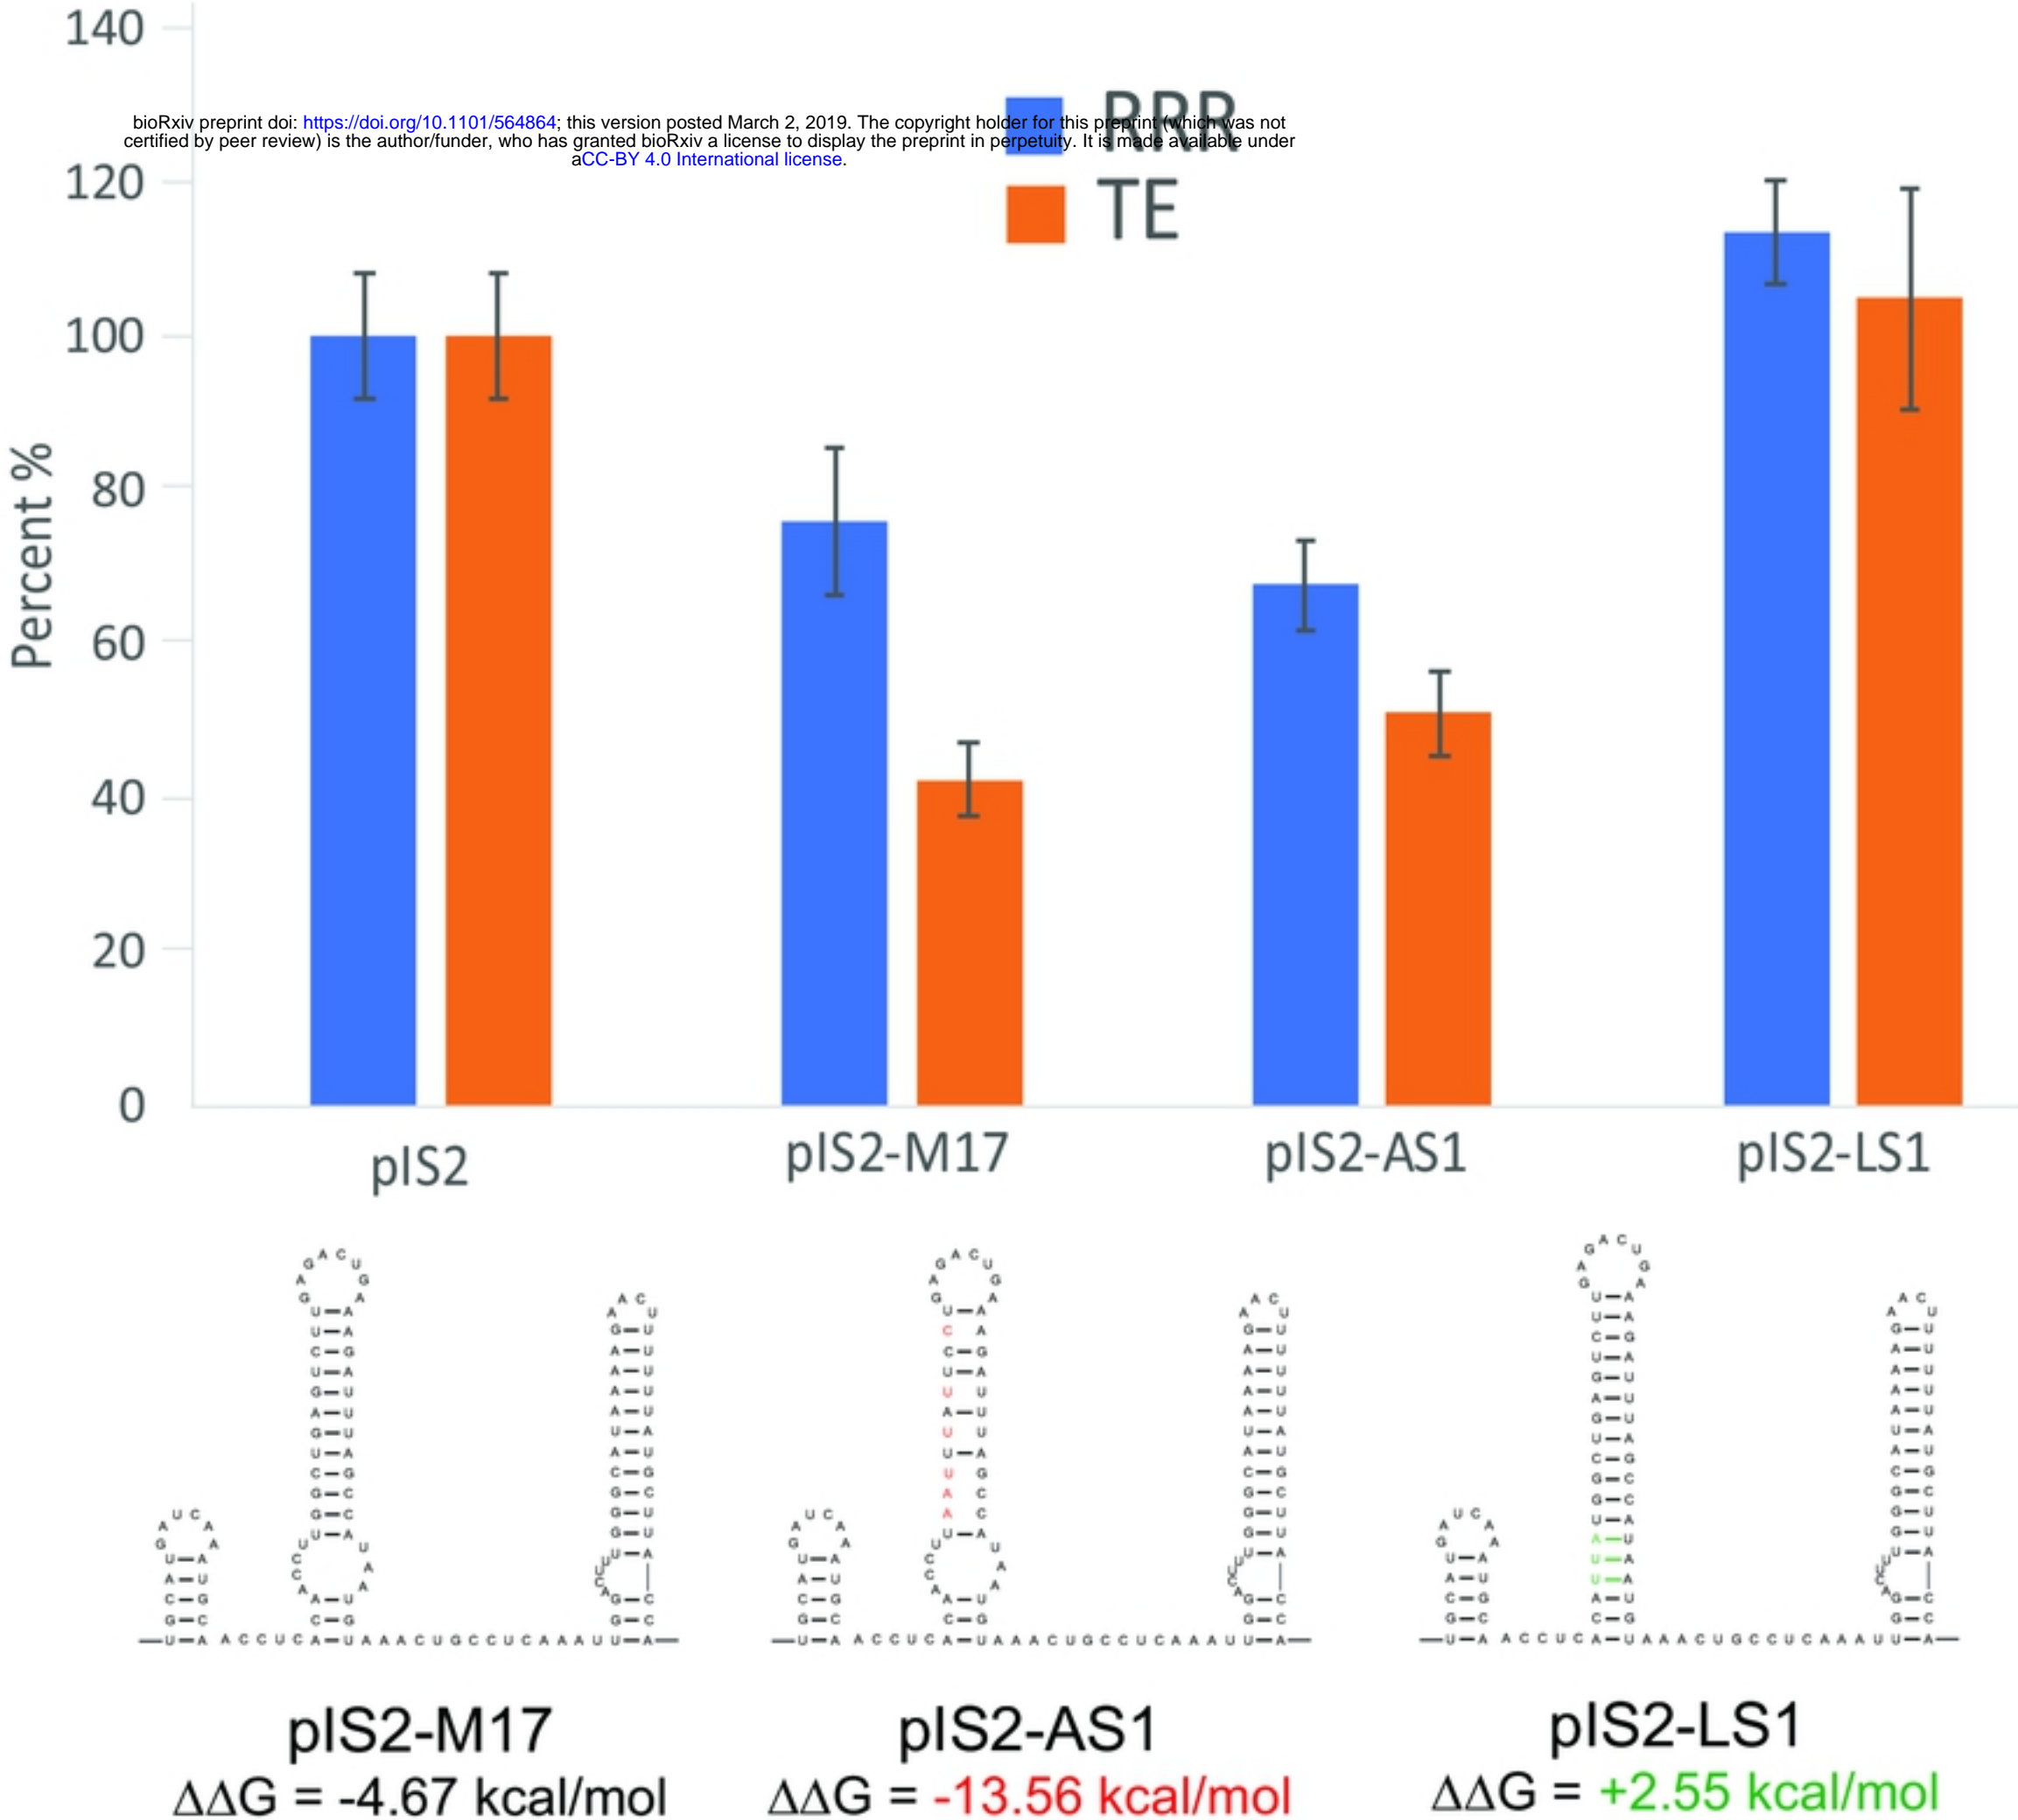

Figure 4



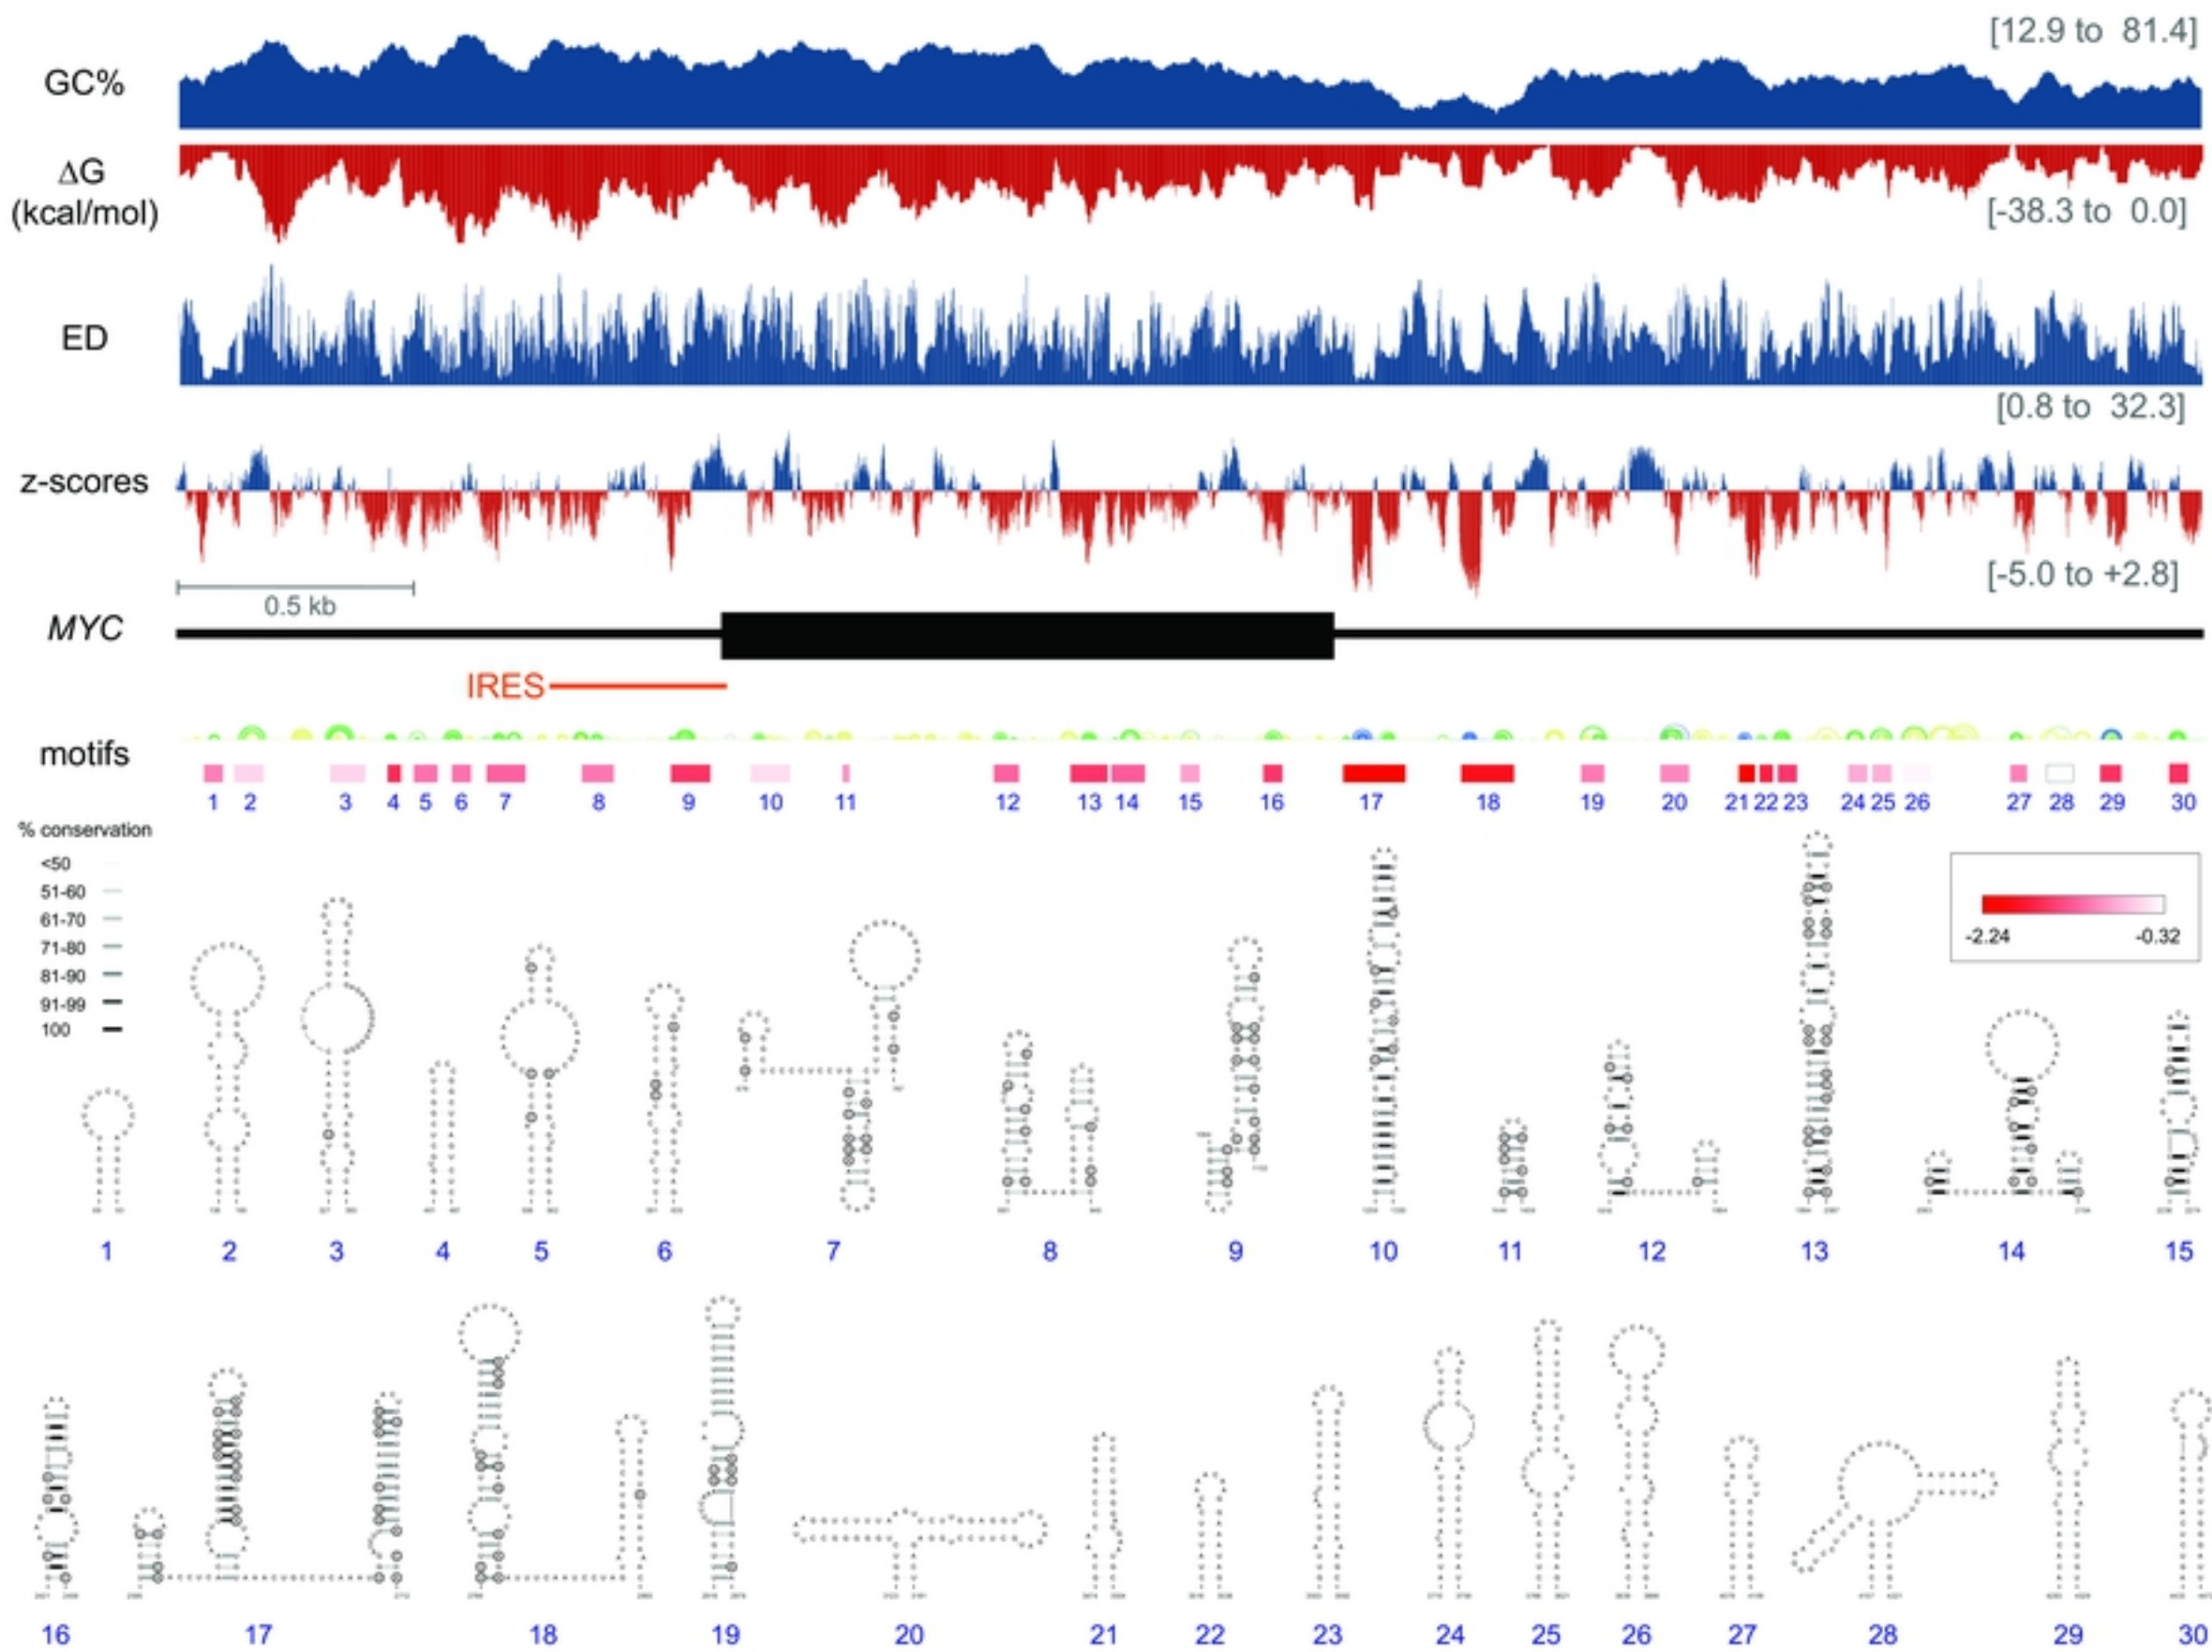

Figure 1
